# 1 **Optimized fluorescent proteins for 4-color and photoconvertible live-cell imaging** 2 **in *Neurospora crassa***

3 Ziyang Wang<sup>\*a</sup>, Bradley M. Bartholomai<sup>\*a</sup>, Jennifer J. Loros<sup>b</sup>, Jay C. Dunlap<sup>a+</sup>

4 <sup>a</sup> Geisel School of Medicine at Dartmouth, Department of Molecular and Systems Biology,  
5 Hanover, NH, USA

6 <sup>b</sup> Geisel School of Medicine at Dartmouth, Department of Biochemistry and Cell Biology,  
7 Hanover, NH, USA

8 \* These authors contributed equally to this work.

9 +Corresponding author:

10 Email: [jay.c.dunlap@dartmouth.edu](mailto:jay.c.dunlap@dartmouth.edu)

11

## 12 **Abstract**

13 Fungal cells are quite unique among life in their organization and structure, and yet  
14 implementation of many tools recently developed for fluorescence imaging in animal systems  
15 and yeast has been slow in filamentous fungi. Here we present analysis of properties of  
16 fluorescent proteins in *Neurospora crassa* as well as describing genetic tools for the expression  
17 of these proteins that may be useful beyond cell biology applications. The efficacy of ten  
18 different fluorescent protein tags were compared in a constant context of genomic and  
19 intracellular location; six different promoters are described for the assessment of the fluorescent  
20 proteins and varying levels of expression, as well as a customizable bidirectional promoter  
21 system. We present an array of fluorescent proteins suitable for use across the visible light  
22 spectrum to allow for 4-color imaging, in addition to a photoconvertible fluorescent protein that  
23 enables a change in the color of a small subset of proteins in the cell. These tools build on the  
24 rich history of cell biology research in filamentous fungi and provide new tools to help expand  
25 research capabilities.

26

## 27 **1. Introduction**

28 The fungal cell is a marvel of evolutionary engineering. Hyphae, as we know them, are unique  
29 among life in their long tubular structure that is highly branched and interconnected. With many  
30 nuclei sharing a crowded cytoplasm that is racing through the interconnected network of hyphae  
31 we know as a mycelium, fungi elicit the question, “What is a cell?”. The microscopic study of  
32 filamentous fungi dates back to the late 17<sup>th</sup> century, when Marcello Malpighi published the  
33 purported first hand drawn micrograph of hyphae (Malpighi, 1675-1679; Money, 2021). Today,  
34 filamentous fungi are the subject of a wide variety of microscopy based cellular investigations.

35 Fluorescence based tools are a cornerstone of contemporary light microscopy-based cell  
36 biology research. Since use of the *Aequorea victoria* green fluorescent protein was introduced in  
37 the early 1990s to tag individual proteins and visualize their subcellular localization, a vast  
38 toolbox of fluorescent proteins has been developed to visualize subcellular phenomena across  
39 the visible light spectrum (Chalfie et al., 1994; Rodriguez et al., 2017). By 2019, the number of  
40 reported fluorescent proteins had grown to such a large number that the community driven  
41 FPbase database was formed to help researchers compare properties of different proteins and  
42 choose the best tools for their needs (Lambert, 2019). However, the vast majority of these  
43 proteins have been optimized for animal systems for which the intracellular milieu and even  
44 amino acid codon preferences may be different from those in fungi; additionally, reported values  
45 for various protein characteristics including brightness, aggregation, pKa, etc. have been  
46 determined *in vitro* or are calculated from theoretical values (Campbell et al., 2020; Day and  
47 Davidson, 2009; Hirano et al., 2022). In fungi, these proteins can perform quite differently than  
48 how one might expect from the reported parameters.

49 While several publications have compared and optimized fluorescent proteins in yeast, few  
50 examples of such work can be found for filamentous fungi (Higuchi-Sanabria et al., 2016; Lee et  
51 al., 2013; Schuster et al., 2015). Unfortunately, tools that work well in yeast do not always  
52 perform similarly in filamentous fungi. Advances in fluorescence microscopy of yeast have also  
53 outpaced filamentous fungi in the use of multiple (up to four) different fluorescent proteins to  
54 visualize different proteins in the same living cell (Higuchi-Sanabria et al., 2016). To address  
55 this gap, we have built upon previous work and developed a set of tools to help expand the  
56 repertoire of fluorescent protein reporters in filamentous fungi, focusing in the present case on  
57 *Neurospora crassa*.

58 Since the first reported use of *A. victoria* GFP in *N. crassa* in 2001, the fluorescent toolbox in  
59 *Neurospora* has expanded modestly to include tdimer2, dsRed, YFP, and mCherry, with GFP  
60 and mCherry being most common (Bardiya et al., 2008; Freitag et al., 2001; Freitag and Selker,  
61 2005; Verdín et al., 2009). The tools presented here were developed as part of our efforts to  
62 understand the spatiotemporal dynamics of the *Neurospora crassa* circadian clock, for which we  
63 had very specific needs that were not met by previously described reporters. For context, the  
64 circadian clock is a single step negative feedback loop in which a complex of proteins scaffolded  
65 by FRQ facilitates the phosphorylation of its transcriptional activators, WC-1 and WC-2 acting as  
66 the White Collar Complex of WCC, depressing its activity. Eventual phosphorylation of FRQ  
67 causes it to lose affinity for the WCC, allowing resynthesis of new FRQ (Diernfellner and  
68 Brunner, 2020; Dunlap and Loros, 2017; Larrondo et al., 2015). Because many of these

69 proteins are expressed at a very low level, to ensure physiological relevance we needed very  
70 bright fluorescent proteins that would allow us to resolve signal from these proteins at their  
71 endogenous expression levels. We also needed to be able to image multiple proteins  
72 concurrently, visualize rapid localization changes, and express reporters and varying  
73 constitutive expression levels.

74 Here we present analysis of brightness and photobleaching properties for a number of  
75 fluorescent proteins in *N. crassa*, studies that revealed a green fluorescent protein that is  
76 significantly brighter than the most commonly used GFP in *Neurospora*. We also optimized a set  
77 of fluorescent proteins that can be used for simultaneous 4-color (blue, green, red, near  
78 infrared) imaging in living hyphae. In addition, we present an optimized photoconvertible protein  
79 that facilitates a color change from green to red after a pulse of violet light thereby allowing  
80 estimation of intracellular mixing rates. These tools can all be driven by a series of promoters  
81 we describe for varying constitutive expression levels of heterologous protein constructs or  
82 over/under expression. Through application of these tools we observed simultaneous  
83 bidirectional transport of separate nuclei through septal pores both antero- and retrograde to  
84 bulk flow as previously described (Mouriño-Pérez et al., 2016; Ramos-García et al., 2009). We  
85 were also able to track movements of nuclei from just one region of a hypha through  
86 implementation of a photoconvertible fluorescent protein and observed apparently stress-related  
87 ring-like and tubular septal structures not seen before in *Neurospora*. We offer these tools to the  
88 community with hopes of expanding the possibilities of investigating the fascinating cellular  
89 biology of filamentous fungi.

90

## 91 **2. Results and Discussion**

### 92 **2.1 Optimization and *in vivo* evaluation of constitutively expressed fluorescent proteins** 93 **in *N. crassa***

94 Experiments in circadian biology involve the study of proteins expressed in a circadian  
95 manner that are relatively low in abundance even at their peak. Cells must also be imaged over  
96 time periods relevant to circadian biology ( $\geq 24$  h). Therefore, we sought out the brightest and  
97 most stable fluorescent proteins (FPs) that have been described in the literature. Unfortunately,  
98 the values provided for brightness, photobleaching, and other parameters that are presented in  
99 databases such as FPbase (Lambert, 2019) are either theoretical, measured *in vitro*, or most  
100 often based on values obtained from mammalian cells. To study fluorescent markers that could  
101 be used to examine the transcription-translation negative feedback loop that comprises the  
102 molecular clock, we required a system that could be used to systematically test fluorescent

103 proteins as well as providing a versatile set of nuclear periphery markers. We decided to use the  
104 outer nuclear envelope nucleoporin SON-1 for this purpose.

105 SON-1 (NCU04288) was previously identified as a homolog to SONA in *Aspergillus nidulans*  
106 (Roca et al., 2010). These proteins are homologous to the highly conserved eukaryotic  
107 RAE1/GLE2 proteins (NCBI HomoloGene:2676). In *Aspergillus*, it was shown to dissociate from  
108 the nuclear envelope during mitosis (De Souza et al., 2004); however, this was not observed in  
109 *Neurospora* (Roca et al., 2010). As a component of the nuclear pore complex (NPC), this  
110 protein interacts with Nup98 (human) on the cytoplasmic ring of the NPC (Von Appen and Beck,  
111 2016), and has been shown to be involved in RNA nuclear export, septin organization, spindle  
112 assembly, and even nucleocytoplasmic shuttling of the core circadian CLOCK/BMAL complex in  
113 mammals (Kato et al., 2021; Murphy et al., 1996; Pritchard et al., 1999; Wong, 2010; Zander et  
114 al., 2017; Zheng et al., 2019). Because SON-1<sup>GFP</sup> had been expressed in *Neurospora*  
115 previously, we used it as a nuclear envelope marker for our work. Additionally, because SON-1  
116 does not leave the nucleus and nuclei are discrete and easy to observe, SON-1 provided a  
117 useful platform from which to examine and compare the efficacy of various candidate  
118 fluorescent proteins in vivo in *Neurospora*. Given this, our screening strategy was to develop a  
119 plasmid capable of (1) driving stable expression of *son-1* tagged with various fluorescent  
120 proteins (FP) and (2) integrating into a fixed neutral site in the genome.

121 In considering a promoter to drive *son-1*<sup>FP</sup> expression, we realized that the most commonly  
122 used promoter for such reporters was *ccg-1*; however, *ccg-1* is highly and conditionally  
123 regulated by light, oxygen levels, and nutrition as well as by the clock (Arpaia et al., 1995; Loros  
124 et al., 1989; McNally and Free, 1988), so we queried data from Hurley et al. (Hurley et al., 2015;  
125 Hurley et al., 2018) seeking a constitutive promoter with a level of expression allowing easy  
126 visualization of the proteins to be tested. From this analysis we chose NCU04502 which is  
127 constitutively transcribed under our conditions and encodes a small “hypothetical protein” that is  
128 constitutively translated. To develop the promoter of NCU04502 for use in screening diverse  
129 fluorescent proteins, we used SON-1 tagged with luciferase and targeted to the *csr-1* locus for  
130 its ease of initial screening, testing several lengths of nucleotides upstream of the NCU04502  
131 transcriptional start site (Supplemental Figure 1A) for expression by measuring bioluminescence  
132 of transformants. Subsequent western blot analysis using a luciferase antibody (Santa Cruz  
133 Biotechnology Cat. #sc-74548) confirmed high luciferase expression from the constructs  
134 containing 600 to 1000 bp of upstream DNA, with 1000 bp seeming to produce the most robust  
135 expression (Supplemental Figure 1B).

136 The integration and expression plasmid was assembled from a pRS426 backbone, bearing  
137 1000 bp flanking sequences used for homologous recombination to the neutral *csr-1* locus,  
138 1000 bp of the NCU04502 promoter positioned at the 5' end of the insertion, followed by the  
139 coding sequence for SON-1 and a 9 amino acid linker. The different FP coding regions could be  
140 easily inserted into the plasmid downstream of *son-1*+linker and upstream of the 3' flank of the  
141 *csr-1* locus (Fig. 1A).

### Figure 1 | *In vivo* properties of constitutively expressed fluorescent proteins in *N. crassa*

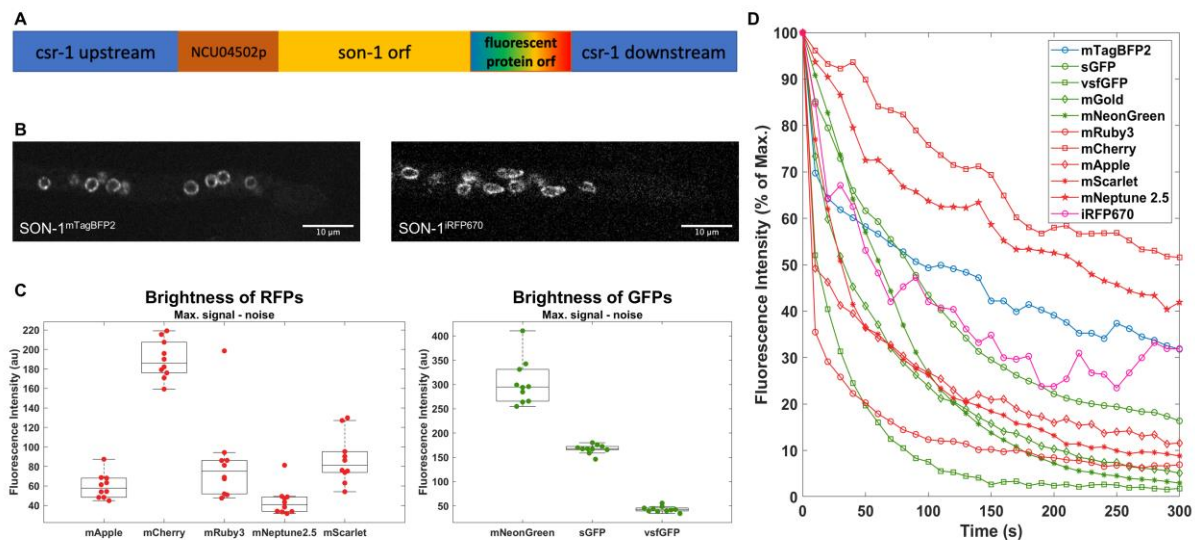

A) Schematic of fluorescent proteins expressing genetic construct. 1 kb upstream and downstream targeting flanks for homologous recombination at the *csr-1* locus were inserted into pRS426. Original or codon-optimized open reading frames of fluorescent protein were inserted downstream of the NCU04502-promoter-driven SON-1 coding region into the vector using Gibson assembly. B) Confocal images showing mTagBFP2 or iRFP670 tagged SON-1 in hyphal tips. C) Fluorescent intensity measurements of RFPs and GFPs when tagging SON-1 in *N. crassa*. Each data point represents the mean of 10 measurements within 1 cell. For each fluorescent protein, n=10 cells. D) Bleaching profile of fluorescent proteins when tagging SON-1 in *N. crassa*. 95% of corresponding lasers were used for bleaching. Each curve represents the average of 3 individual measurements.

142  
143 Green fluorescent proteins (GFPs) (Freitag et al., 2001) and red fluorescent proteins (RFPs)  
144 (Freitag and Selker, 2005) are the most commonly used fluorescent proteins in *N. crassa*. To  
145 extend the usable light spectrum for filamentous fungal cell biology research, we optimized the  
146 coding sequence of a rapidly-maturing monomeric blue fluorescent protein mTagBFP2 (Subach  
147 et al., 2011) to better fit the strong codon bias observed in *N. crassa* (Zhou et al., 2013). The  
148 optimized mTagBFP2 was successfully appended to SON-1 and produced bright *in vivo* signals



149 (Fig. 1B). We also successfully visualized SON-1 constructs bearing a near-infrared fluorescent  
150 protein iRFP670 (Fig. 1B) and its monomeric version miRFP670-2 (data not shown). With these  
151 additional constitutively fluorescent proteins available, the potential of live-cell imaging in  
152 filamentous fungus has been largely improved.

153 We have also optimized various monomeric RFPs (mRFPs) and monomeric GFPs (mGFPs)  
154 not previously been widely used in filamentous fungi, tested their *in vivo* brightness and  
155 photostability properties, and compared them with the conventionally used monomers mCherry  
156 (Castro-Longoria et al., 2010) and sGFP (Freitag et al., 2001), respectively. mApple, mRuby,  
157 and mScarlet are among the best performing mRFPs and are brighter than mCherry in  
158 mammalian systems (Bajar et al., 2016b; Bindels et al., 2017; Shaner et al., 2004; Shaner et al.,  
159 2008). However, when appended to SON-1 in *N. crassa*, mCherry displayed the highest  
160 brightness and best photostability (Fig. 1C&D). We have also tested codon-optimized  
161 mNeptune2.5, which has a significantly more red-shifted emission spectrum than the other  
162 mRFPs while still being excited by a 561nm laser. This would allow more separation between  
163 the emission spectra during multi-color imaging and potentially reduce bleed-through.  
164 mNeonGreen is a very rapidly maturing bright monomeric yellow-green fluorescent protein  
165 derived from *Branchiostoma lanceolatum* (Shaner et al., 2013). Codon-optimized mNeonGreen  
166 produced significantly brighter signals than sGFP as expected (Fig. 1C), which makes it perfect  
167 for tagging proteins with low expression levels. Surprisingly, codon-optimized vsfGFP-9, which  
168 was predicted to have brightness similar to mNeonGreen, turned out to be very dim and  
169 sensitive to bleaching (Fig. 1C&D). These data confirm anecdotal observations suggesting that  
170 performance of fluorescent proteins in filamentous fungi is not always consistent with either  
171 theoretical predictions or measurements in mammalian systems.

## 172 **2.2 Constitutive promoters driving diverse expression levels**

173 In anticipation of needing a range of constitutive expression levels for different proteins, we  
174 tested a series of promoters using the same luciferase expression system as previously  
175 employed when characterizing the promoter of NCU04502, by inserting different promoters into  
176 the *csr-1::[promoter]-luciferase* plasmid. The promoters compared were *ccg-1* (*N. crassa*), *gpd*  
177 (*Cochliobolus heterostrophus*), NCU04502 (*N. crassa*), CMV immediate early, *ToxA* (*P. tritici-*  
178 *repentis*), and NCU08097 (*N. crassa*). The *ccg-1* promoter has long been a gold standard for a  
179 strong promoter in *Neurospora*. We described above the robust expression of the NCU04502  
180 promoter, of which the 600 bp form was used for this project (Supplemental Table 1). The CMV  
181 immediate early promoter is widely used in animal systems as a strong promoter and is  
182 commonly found in mammalian expression vectors. The *gdp* and *ToxA* promoters were

183 suggested by Michael Freitag (Oregon State University) as candidates for high and low  
184 expression, respectively. NCU08097 was identified as one of the lowest constitutively  
185 expressed genes in the *Neurospora* transcriptome with a log<sub>10</sub> RPKM value of greater than 0  
186 and less than 0.5 (Hurley et al., 2015). We constructed plasmids with 1500, 1000, and 500 bp of  
187 DNA upstream from the transcriptional start site and they all produced bioluminescence (data  
188 not shown), so we retained only the shortest variant for this comparison (Supplemental Table 1).

189 Transformation cassettes from the *csr::[promoter]-luc* plasmids were amplified by PCR and  
190 transformed into WT *N. crassa*. LUC expression was initially determined by placing mycelia of  
191 transformants growing on agar slants containing luciferin into a luminometer and measuring  
192 bioluminescence. Once the strains were established, they were analyzed by western blot using  
193 a luciferase antibody at 1:5000 (Abcam Cat. # ab185924), along with a tubulin antibody at  
194 1:10000 (Sigma Cat. # T6199) as a loading control (Figure 2). Through this process, we  
195 identified promoter expression ranging from very strong to very weak. One surprising result was  
196 that the CMV promoter, which is commonly thought of as a very strong promoter in animals only  
197 provided a moderate level of expression in *Neurospora*.

**Figure 2 | Analysis of promoters for varying levels of constitutive expression**

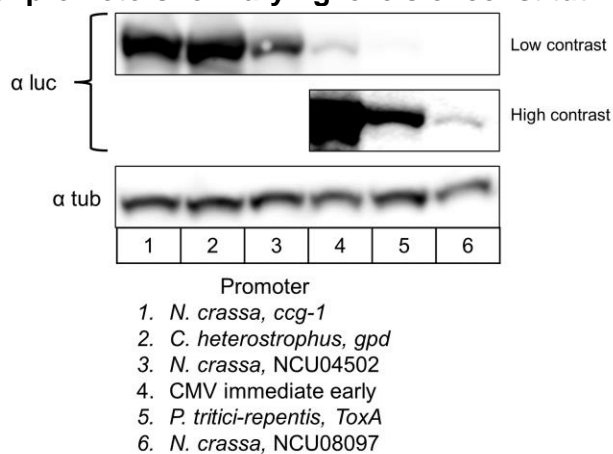

Western blot analysis of luciferase to compare the relative strength of 6 different constitutive promoters for use in overexpression or heterologous protein constructs. 30 μg of total protein from *N. crassa* lysates were run in each well. Tubulin was used as a loading control. The upper and lower images of the luciferase blots were contrasted differently in ImageJ to make lane 6 visible. Lanes 1-3 were highly saturated at high contrast and therefore omitted from the second row.

198

### 199 **2.3 4-color live cell imaging reveals 3D structure of *Neurospora crassa* mycelium**

200 Incorporating multiple fluorescent protein tags into the same strain can be extremely useful  
201 to monitor the dynamic interactions between proteins and/or cell compartments. In recent years,  
202 3 or 4-color live-cell imaging systems have been developed in mammalian cells and *S.*  
203 *cerevisiae* (Bajar et al., 2016a; Higuchi-Sanabria et al., 2016; Lee et al., 2013). However, to our

204 knowledge no optimized fluorescent protein combination for 4-color imaging has been reported  
205 for filamentous fungi. Using the fluorescent protein tags we have adapted, we built a proof-of-  
206 principle strain using 4 different-colored fluorescent proteins to tag well-established cellular  
207 markers localized at different cellular locations.

208 We chose mTagBFP2 (blue), mNeonGreen (green), mApple (red), and iRFP670 (near  
209 Infrared) for which the spectra match with the classic excitation laser lines (405nm, 488nm,  
210 561nm, 640nm) and CHROMA® Quad bandpass filter 89100bs, so that we can conduct fast 4-  
211 color imaging without switching between filters and minimizing bleed-through (Supplemental  
212 Figure 2). To prove that these tags do not interfere with correct localization, we tagged BML ( $\beta$ -  
213 tubulin) marking microtubules with mTagBFP2 (Freitag et al., 2004; Mouriño-Pérez et al., 2006),  
214 Septin CDC-11 marking septa, branching sites, and sub-apical compartments with  
215 mNeonGreen (Berepiki and Read, 2013; Riquelme and Martínez-Núñez, 2016), a core  
216 photoreceptor and clock protein WC-2 marking nuclei with mApple (Cheng et al., 2001;  
217 Schafmeier et al., 2008; Schwerdtfeger and Linden, 2000), and the nuclear pore complex (NPC)  
218 component SON-1 with iRFP670 (Roca et al., 2010). All fluorescent tags were added to the C  
219 terminus of the corresponding proteins. *cdc-1*<sup>mNeonGreen</sup> and *wc-2*<sup>mApple</sup> were edited at their  
220 endogenous locus. *bm*<sup>mTagBFP2</sup> and *son-1*<sup>iRFP670</sup> were driven by a constitutive bidirectional  
221 promoter (*toxA* and *gdp* promoters, respectively) which we developed for this project and placed  
222 at the *csr-1* locus (Fig. 3A).

223 Using confocal microscopy of a culture growing on agar gel pads (see Materials and  
224 Methods), we were able to capture structures of these cellular compartments in 4-dimensions in  
225 the same cell with high spatial resolution. All markers showed expected localization patterns  
226 (Fig. 3B & Supplemental movie 1). With 4-color live-cell imaging, we directly visualized the  
227 dynamic relationship between the cytoskeleton and nuclei inside the complex mycelium  
228 network. At the septum, microtubule bundles are squeezed through septal pores while retaining  
229 integrity. Nuclei were tethered to microtubules and traveled along the mycelium, through the  
230 septal pore, and went into different branches. Interestingly, besides the anticipated movements  
231 going with the cytoplasmic bulk flow (indicated by filled arrows), there were also nuclei dragged  
232 through the septal pore against the bulk flow (indicated by open arrows) in the same region (Fig.  
233 3C & Supplemental movie 2). Microtubules form patches at the points where nuclei are  
234 tethered, and these patches are highly associated with the nuclear envelope (Fig. 3D).



235

**Figure 3 | 4-color live cell imaging reveals 4-dimensions cellular structures of *Neurospora crassa* mycelium**

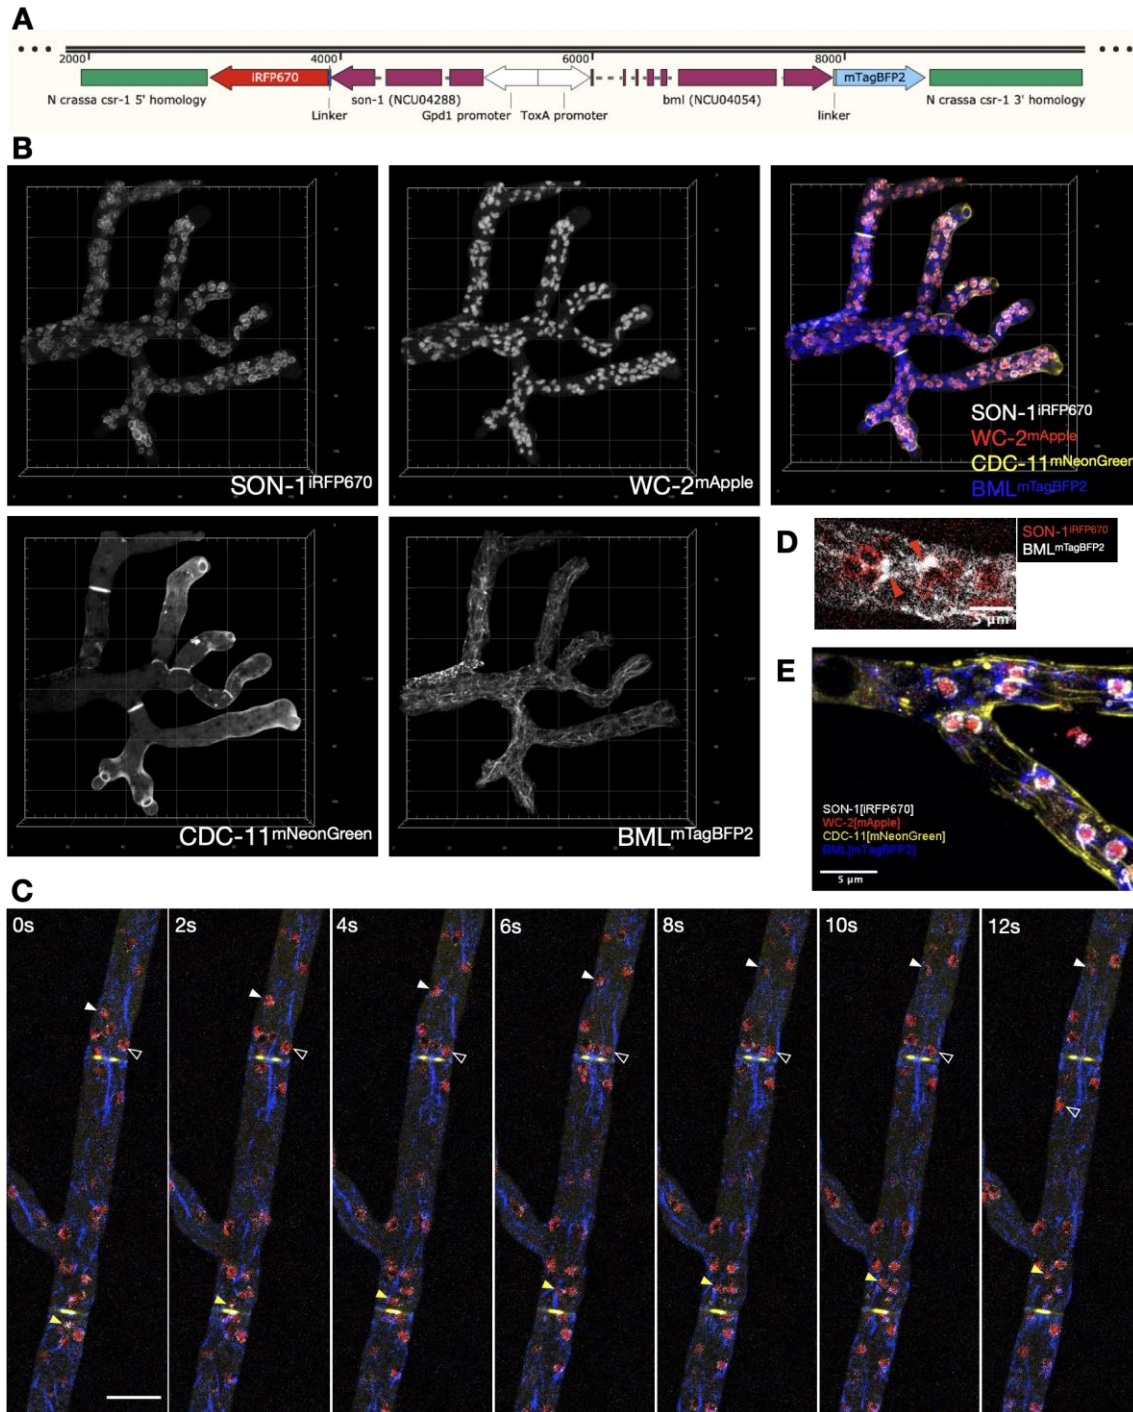

A) Schematic of BML and SON-1 tagging genetic construct using a bidirectional promoter. *C. heterostrophus* *gpd-1* promoter was used to drive the expression of *son-1* tagged by iRFP670. *P. tritici-repentis* *toxA* promoter was used to drive the expression of *bml* tagged by mTagBFP2. 1 kb upstream and downstream targeting flanks for homologous recombination at the *csr-1* locus were inserted into pRS426. B) 3D rendered images of a hyphal tip from a culture grown on agar gel pads from the 4-color strain showing each channel or merged channel. C) Time lapse imaging of the living 4-color strain. The filled arrows (white and yellow) indicate nuclei moving along the cytoplasmic flow; the empty arrows indicate a nucleus moving against the cytoplasmic flow. Grey: SON-1<sup>iRFP670</sup>, Red: WC-2<sup>mApple</sup>, Yellow: CDC-11<sup>mNeonGreen</sup>, Blue: BML<sup>mTagBFP2</sup>. Scale bar = 10 μm. D) Single focal image of the nuclear envelope (SON-1 in red) and microtubules (BML in greys). Red arrows indicate microtubule patches associated with the nuclear envelope. E) Z-projection of an unhealthy region in *N. crassa* mycelium network with ring-like and tubular septin structures (yellow).

236 These observations suggest there may be a more direct interaction between microtubules and  
237 the nuclear envelope than current models describe (Mouriño-Pérez et al., 2016; Ramos-García  
238 et al., 2009). We have also observed a localization pattern of septins that has never been  
239 reported in *N. crassa*, in which in dying filaments, CDC-11 localizes to ring-like and tubular  
240 structures (Fig. 3D). A similar localization pattern of AspD, the CDC10 class of septins, has  
241 been reported in *Aspergillus fumigatus* hyphal tip (Juvvadi et al., 2011).

## 242 **2.4 Photoconvertible fluorescent protein mEos3.1 helps monitor the dynamics of specific** 243 **nuclei**

244 Photoactivatable, photoconvertible and photoswitchable fluorescent proteins are relatively  
245 recent additions to the toolbox of live cell imaging research. They are known as “optical  
246 highlighters” due to their ability to change their excitation and emission spectrum upon  
247 stimulation. Photoconvertible proteins initially emit green light after excitation by a 488nm laser,  
248 but after stimulation (photoconversion) with UV light, they can then be excited by a 561nm laser  
249 instead and emit red light. Since the first report of a photoconvertible fluorescent protein in 2002  
250 (Ando et al., 2002), such proteins have been adapted for a variety of uses. The first version of  
251 Eos was reported in 2004 (Wiedenmann et al., 2004), Dendra2 and mEosFP*thermo* were used  
252 in *Aspergillus nidulans* to monitor protein dynamics and to conduct super-resolution microscopy  
253 (Bergs et al., 2016; Zhou et al., 2018), and improved Eos variants continue to be developed.  
254 mEos3.1, a newer monomeric EosFP variant developed in 2012, displays higher brightness,  
255 faster maturation, and no incorrect localization caused by dimerization (Lippincott-Schwartz and  
256 Patterson, 2009; Zhang et al., 2012) but has never been adapted for use in filamentous fungi.

257 We codon-optimized the coding sequence of mEos3.1 for *N. crassa* and used it to tag  
258 histone H1 at its C terminus. We also added a V5 epitope tag between mEos3.1 and the open  
259 reading frame to allow confirmation of expression during troubleshooting and for the  
260 convenience of potential biochemical work. The expression of *hH1<sup>mEos3.1-V5</sup>* was driven by the  
261 *ccg-1* promoter and expressed from the *csr-1* locus (Fig. 4A), and this codon-optimized  
262 mEos3.1 fusion protein fluoresces properly. Before stimulation, hH1<sup>mEos3.1</sup> could only be excited  
263 by a 488nm laser with no fluorescent signal showing up in the red channel. Using a 405nm laser  
264 we converted a subset of nuclei within a defined region of interest (ROI, shown as yellow  
265 squares) in the middle of a highly dynamic filament. After the illumination, hH1<sup>mEos3.1</sup> within the

## Figure 4 | Tracking nuclear movement with a photoconvertible fluorescent protein mEos3.1

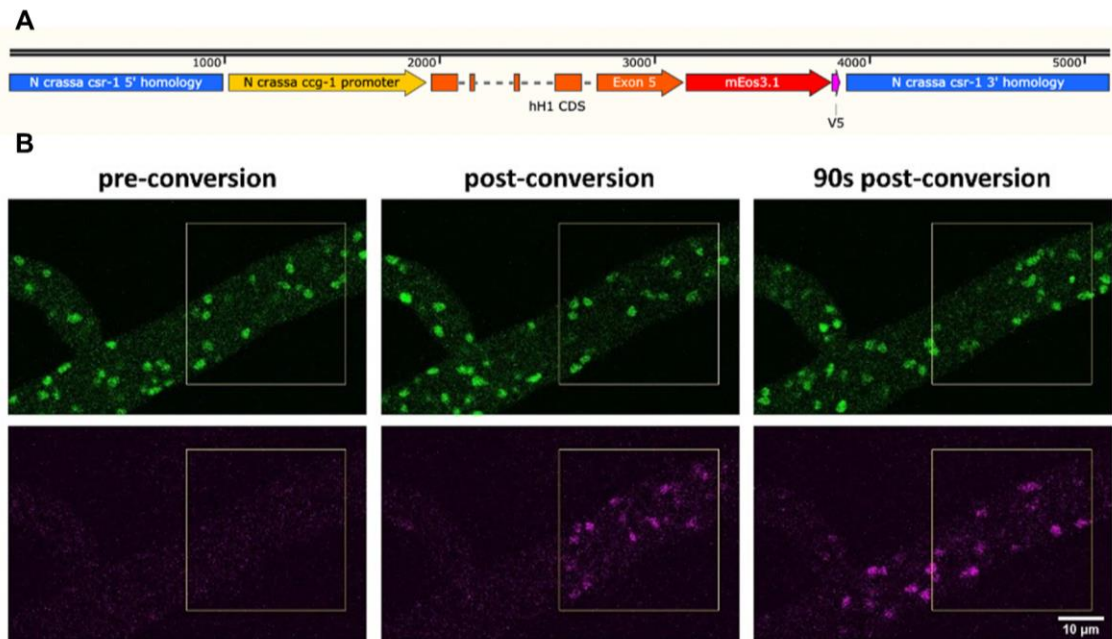

A) Schematic of  $hH1^{mEos3.1}$  tagging genetic construct. 1 kb upstream and downstream targeting flanks for homologous recombination at the *csr-1* locus were inserted into pRS426. The whole coding sequence of histone H1 followed by codon-optimized mEos3.1 and V5 epitope tag was inserted downstream of the *ccg-1* promoter into the vector using Gibson assembly. B) Time lapse imaging of histone H1 tagged with mEos3.1. The yellow square indicates the region chosen for photostimulation by 405 nm light to convert mEos3.1 from green to red. Images shown were acquired immediately before photoconversion, immediately after, and after 1.5 minutes of continuous imaging.

266

267 exposed ROI were distinctly photoconverted to the red form and could be excited by 561nm  
268 laser (Fig. 4B). Converted mEos3.1 remained in its red-light emitting form, and thus could be  
269 used for long-term scanning (Hickey et al., 2004). We were able to track the movement of  
270 converted nuclei by monitoring the red channel (Supplemental Movie 3).

271 This proof-of-principal experiment showed the great potential of photoconvertible proteins.  
272 Besides monitoring traffic in a mycelial network, this tool can also be applied to other aspects of  
273 protein dynamic research (e.g. nucleocytoplasmic transportation, protein movements along the  
274 cytoskeleton, protein redistribution after fusion, etc.). In addition, mEos3.1 has properties  
275 suitable for recently developed super-resolution imaging techniques such as PALM and  
276 STORM.

### 277 3. Conclusions

278 The tools presented herein expand our ability to probe the cellular biology of *N. crassa* and  
279 should be applicable to a wide range of other filamentous fungi. The luciferase-based system for  
280 rapid testing of transcriptional promoters, set of promoters that express mRNA from very low to

281 very high levels, and a customizable bidirectional promoter system can benefit researchers in a  
282 number of applications, not limited to fluorescence microscopy and cell biology. Analysis of  
283 brightness and bleaching among several fluorescent proteins in *N. crassa* provides valuable  
284 insights into which available fluorescent proteins might be best for various needs by revealing  
285 the tradeoffs one can expect surrounding brightness vs. bleaching when planning experiments.  
286 The ability to acquire images of four different proteins simultaneously facilitates design of  
287 experiments in which correlations and relationships of movements and activities among multiple  
288 independent proteins can be observed simultaneously. Finally, the optimization and  
289 characterization of a photoconvertible protein that permits a change in the color of proteins in  
290 discrete regions within a cell and for tracking their movement can promote a better  
291 understanding of how the fungal cytoplasm is organized, and how molecular trafficking works at  
292 a much deeper level.

293

#### 294 **4. Materials and Methods**

##### 295 *Plasmids and strains used*

296 All plasmids reported in this work were constructed using NEBuilder® HiFi DNA Assembly  
297 Master Mix (New England Biolabs Cat. #E2621), based on the Gibson assembly method  
298 (Gibson et al., 2009). The common backbone plasmid used was pRS426, in which the multiple  
299 cloning site was replaced by the various DNA fragments described. The consensus wild type  
300 strain OR74A (FGSC#2489) was the parent strain for all experiments. In some cases, in which  
301 sexual crosses were required to obtain homokaryons, or when transforming into loci other than  
302 *csr-1*,  $\Delta$ *mus-51* strain were used.

303

##### 304 *Western Blots*

305 20  $\mu$ g of total protein normalized by Bradford assay was run in each well of a pre-cast Bis-Tris  
306 gel (ThermoFisher Scientific, Catalog #NP0336) in MOPS buffer (ThermoFisher Scientific,  
307 Catalog #NP0001). The protein was transferred from the gel onto PVDF membrane using an  
308 iBlot gel transfer system (ThermoFisher Scientific). Antibody incubations were carried out in 5%  
309 nonfat milk in TBS buffer containing 0.2% Tween-20. Luciferase was detected using luciferase  
310 antibody (C-12) (Santa Cruz, sc-74548) as a primary antibody and HRP conjugated goat anti-  
311 mouse IgG secondary antibody (BIO-RAD, Catalog # #1706516). Chemiluminescence was  
312 detected using film for figure S1 and an Azure c400 imaging system (Azure Biosystems) for  
313 figure 2.

314



315 *Promoters and codon optimized fluorescent proteins*

316 Promoter sequences for *N. crassa ccg -1*, NCU04502, and NCU08097 were retrieved from  
317 FungiDB; *gpd* (*Cochliobolus heterostrophus*) and *ToxA* (*P. tritici-repentis*) from JGI *Mycocosm*  
318 (<https://mycocosm.jgi.doe.gov/>). Among the fluorescent proteins used, coding sequences for  
319 sGFP (Freitag et al., 2004), mApple, mRuby3, mScarlet, mCherry, iRFP670 were used without  
320 modification, mApple-C1 was a gift from Michael Davidson (Addgene plasmid # 54631 ;  
321 <http://n2t.net/addgene:54631> ; RRID:Addgene\_54631) (Kremers et al., 2009). pKanCMV-  
322 mRuby3-18aa-Tubulin was a gift from Michael Lin (Addgene plasmid # 74256 ;  
323 <http://n2t.net/addgene:74256> ; RRID:Addgene\_74256) (Bajar et al., 2016b). pmScarlet\_C1 was  
324 a gift from Dorus Gadella and the CMV immediate-early promoter described herein was  
325 amplified from this plasmid, as well as the mScarlet encoding gene (Addgene plasmid # 85042 ;  
326 <http://n2t.net/addgene:85042> ; RRID:Addgene\_85042) (Bindels et al., 2017). The CMV  
327 immediate-early promoter described the pCRE-iRFP670 was a gift from Alan Mullen (Addgene  
328 plasmid # 82696 ; <http://n2t.net/addgene:82696> ; RRID:Addgene\_82696) (Daneshvar et al.,  
329 2016). mNeonGreen was originally provided in a plasmid by Allele Biotechnology (Shaner et al.,  
330 2013). mNeonGreen, vsfGFP-9 (Eshaghi et al., 2015), mNeptune2.5 (Chu et al., 2014), and  
331 mTagBFP2 (Subach et al., 2011) were codon optimized by applying the Neurospora codon bias  
332 settings in SnapGene. All plasmids containing the SON-1-Fluorescent Protein fusions and their  
333 sequence data will be deposited at Addgene ([www.addgene.org/](http://www.addgene.org/)) (Supplemental Table 2 & 3).

334

335 *Sample preparation*

336 *Neurospora crassa* strains were grown overnight on agar pads (1x Vogel's, 2% glucose, 0.17%  
337 arginine, 50ng/ml biotin, 1.5% agar) in Petri plates at 25°C starting from fresh conidia.  
338 Vegetative hyphae at the edge of growing colonies were imaged using the inverted agar block  
339 method (Hickey et al., 2004).

340

341 *Brightness measurements and Photobleaching*

342 Strains were imaged using a Nikon Eclipse Ti-E microscope with Yokogawa CSU-W1 spinning  
343 disk system, Photometrics Prime BSI sCMOS camera, and piezo Z-drive. A Nikon LU-N4 laser  
344 launch that includes 405 nm, 488 nm, 561 nm and 640 nm lasers was used for excitation. The  
345 objective we used was Nikon CFI Plan Apochromat Lambda D 60X Oil objective (numerical  
346 aperture (NA) = 1.42).

347 For brightness measurements, 8µm Z-stacks with 300nm step size were taken for each strain  
348 using either 50% 561nm with 300ms exposure time (for RFPs) or 30% 488nm laser with 100ms



349 exposure (for GFPs). The fluorescent intensities of 10 8x8 pixel ROIs with bright SON-1 signal  
350 and 10 8x8 pixel ROIs with cytoplasmic noise from each region were measured in ImageJ. The  
351 mean of 10 measurements was calculated and the noise-subtracted average SON-1 signal of  
352 each region was plotted.

353 95% corresponding excitation laser was used to perform photobleaching. Images were taken  
354 every 10s (300ms exposure time) for 5min. A 125x125 pixel ROI was created for each tip (and  
355 background) and the brightness of this region was measured in ImageJ. For each strain, the  
356 bleaching profiles of 5 healthy tips were measured. Background-subtracted means were  
357 normalized to that of the first timepoint of each time course and plotted.

358

#### 359 *4-color imaging*

360 The 4-color strain was cultured as described above using the inverted agar block method  
361 (Hickey et al., 2004), and imaged using the Spinning disk confocal microscope as described  
362 above in the “Brightness measurements and Photobleaching” section with a CHROMA Quad  
363 bandpass filter (89100bs). 4 channels were imaged sequentially. 10 $\mu$ m Z-stacks or 1s-interval  
364 time series were taken. 3D rendering was performed in Arivis Vison4D software. Max projection  
365 and time series were processed in ImageJ.

366

#### 367 *Photoconversion*

368 Images were captured using Zeiss LSM880 equipped with an Airyscan detector, using a Zeiss  
369 Plan-Apochromat 63x/1.4 Oil DIC M27 objective. 6 iterations of a 20% 405nm laser were used  
370 to perform photoconversion within a selected ROI. Time series were recorded at 10s intervals  
371 with both 488nm and 561nm channels. Images were processed in Zeiss Zen software and  
372 labeled in ImageJ.

373

#### 374 **CRedit authorship contribution statement**

375

376 **Ziyan Wang:** Conceptualization, Methodology, Software, Validation, Formal analysis,  
377 Investigation, Data curation, Writing – Original Draft, Writing – Review & Editing, Visualization.

378 **Bradley M. Bartholomai:** Conceptualization, Methodology, Software, Validation, Formal  
379 analysis, Investigation, Data curation, Writing – Original Draft, Writing – Review & Editing,  
380 Visualization. **Jennifer J. Loros:** Conceptualization, Resources, Supervision, Project

381 administration, Funding acquisition. **Jay C. Dunlap:** Conceptualization, Resources, Writing –  
382 Review & Editing, Supervision, Project administration, Funding acquisition

383

#### 384 **Declaration of Competing Interest**

385 The authors declare that they have no known competing financial interests or personal  
386 relationships that could have appeared to influence the work reported in this paper.

387

### 388 **Acknowledgements**

389 The *gdp* and *ToxA* promoters were gifts from Michael Freitag (Oregon State University). This  
390 work was supported by grants from the National Institutes of Health to J.C.D. (R35GM118021)  
391 and J.J.L. (R35GM118022), as well as Dartmouth's BioMT NIH NIGMS COBRE grant, P20-  
392 GM113132.

393

### 394 **References**

395

- 396 Ando, R., et al., 2002. An optical marker based on the UV-induced green-to-red  
397 photoconversion of a fluorescent protein. *Proceedings of the National Academy of*  
398 *Sciences.* 99, 12651-12656.
- 399 Arpaia, G., et al., 1995. Light induction of the clock-controlled gene *ccg-1* is not transduced  
400 through the circadian clock in *Neurospora crassa*. *Molecular and General Genetics MGG.*  
401 247, 157-163.
- 402 Bajar, B. T., et al., 2016a. Fluorescent indicators for simultaneous reporting of all four cell cycle  
403 phases. *Nature methods.* 13, 993-996.
- 404 Bajar, B. T., et al., 2016b. Improving brightness and photostability of green and red fluorescent  
405 proteins for live cell imaging and FRET reporting. *Scientific reports.* 6, 1-12.
- 406 Bardiya, N., et al., 2008. Characterization of interactions between and among components of  
407 the meiotic silencing by unpaired DNA machinery in *Neurospora crassa* using  
408 bimolecular fluorescence complementation. *Genetics.* 178, 593-596.
- 409 Berepiki, A., Read, N. D., 2013. Septins are important for cell polarity, septation and asexual  
410 spore formation in *Neurospora crassa* and show different patterns of localisation at  
411 germ tube tips. *PLoS one.* 8, e63843.
- 412 Bergs, A., et al., 2016. Dynamics of actin cables in polarized growth of the filamentous fungus  
413 *Aspergillus nidulans*. *Frontiers in microbiology.* 7, 682.
- 414 Bindels, D. S., et al., 2017. mScarlet: a bright monomeric red fluorescent protein for cellular  
415 imaging. *Nature methods.* 14, 53-56.
- 416 Campbell, B. C., et al., 2020. mGreenLantern: a bright monomeric fluorescent protein with rapid  
417 expression and cell filling properties for neuronal imaging. *Proceedings of the National*  
418 *Academy of Sciences.* 117, 30710-30721.
- 419 Castro-Longoria, E., et al., 2010. Circadian rhythms in *Neurospora crassa*: dynamics of the clock  
420 component frequency visualized using a fluorescent reporter. *Fungal Genetics and*  
421 *Biology.* 47, 332-341.
- 422 Chalfie, M., et al., 1994. Green fluorescent protein as a marker for gene expression. *Science.*  
423 263, 802-805.

- 424 Cheng, P., et al., 2001. Coiled-coil domain-mediated FRQ-FRQ interaction is essential for its  
425 circadian clock function in *Neurospora*. *The EMBO Journal*. 20, 101-108.
- 426 Chu, J., et al., 2014. Non-invasive intravital imaging of cellular differentiation with a bright red-  
427 excitable fluorescent protein. *Nature methods*. 11, 572-578.
- 428 Daneshvar, K., et al., 2016. DIGIT is a conserved long noncoding RNA that regulates GSC  
429 expression to control definitive endoderm differentiation of embryonic stem cells. *Cell*  
430 *reports*. 17, 353-365.
- 431 Day, R. N., Davidson, M. W., 2009. The fluorescent protein palette: tools for cellular imaging.  
432 *Chemical Society Reviews*. 38, 2887-2921.
- 433 De Souza, C. P., et al., 2004. Partial nuclear pore complex disassembly during closed mitosis in  
434 *Aspergillus nidulans*. *Current biology*. 14, 1973-1984.
- 435 Diernfellner, A. C., Brunner, M., 2020. Phosphorylation timers in the *Neurospora crassa*  
436 circadian clock. *Journal of molecular biology*. 432, 3449-3465.
- 437 Dunlap, J. C., Loros, J. J., 2017. Making time: conservation of biological clocks from fungi to  
438 animals. *Microbiology spectrum*. 5, 5.3. 05.
- 439 Eshaghi, M., et al., 2015. Rational structure-based design of bright GFP-based complexes with  
440 tunable dimerization. *Angewandte Chemie*. 127, 14158-14162.
- 441 Freitag, M., et al., 2001. Expression and visualization of green fluorescent protein (GFP) in  
442 *Neurospora crassa*. *Fungal Genetics Reports*. 48, 15-19.
- 443 Freitag, M., et al., 2004. GFP as a tool to analyze the organization, dynamics and function of  
444 nuclei and microtubules in *Neurospora crassa*. *Fungal Genetics and Biology*. 41, 897-910.
- 445 Freitag, M., Selker, E. U., 2005. Expression and visualization of red fluorescent protein (RFP) in  
446 *Neurospora crassa*. *Fungal Genetics Newsletter*. 52, 14.
- 447 Gibson, D. G., et al., 2009. Enzymatic assembly of DNA molecules up to several hundred  
448 kilobases. *Nature methods*. 6, 343-345.
- 449 Hickey, P. C., et al., 2004. Live-cell imaging of filamentous fungi using vital fluorescent dyes and  
450 confocal microscopy. *Methods in microbiology*. 34, 63-87.
- 451 Higuchi-Sanabria, R., et al., 2016. Characterization of fluorescent proteins for three-and four-  
452 color live-cell imaging in *S. cerevisiae*. *PLoS One*. 11, e0146120.
- 453 Hirano, M., et al., 2022. A highly photostable and bright green fluorescent protein. *Nature*  
454 *Biotechnology*. 1-11.
- 455 Hurley, J. M., et al., 2015. A tool set for the genome-wide analysis of *Neurospora crassa* by RT-  
456 PCR. *G3: Genes, Genomes, Genetics*. 5, 2043-2049.
- 457 Hurley, J. M., et al., 2018. Circadian proteomic analysis uncovers mechanisms of post-  
458 transcriptional regulation in metabolic pathways. *Cell systems*. 7, 613-626. e5.
- 459 Juvvadi, P. R., et al., 2011. Differential localization patterns of septins during growth of the  
460 human fungal pathogen *Aspergillus fumigatus* reveal novel functions. *Biochemical and*  
461 *biophysical research communications*. 405, 238-243.
- 462 Kato, K., et al., 2021. Overexpression of SARS-CoV-2 protein ORF6 dislocates RAE1 and NUP98  
463 from the nuclear pore complex. *Biochemical and biophysical research communications*.  
464 536, 59-66.
- 465 Kremers, G.-J., et al., 2009. Photoconversion in orange and red fluorescent proteins. *Nature*  
466 *methods*. 6, 355-358.

- 467 Lambert, T. J., 2019. FPbase: a community-editable fluorescent protein database. *Nature*  
468 *methods*. 16, 277-278.
- 469 Larrondo, L. F., et al., 2015. Decoupling circadian clock protein turnover from circadian period  
470 determination. *Science*. 347.
- 471 Lee, S., et al., 2013. Improved blue, green, and red fluorescent protein tagging vectors for *S.*  
472 *cerevisiae*. *PloS one*. 8, e67902.
- 473 Lippincott-Schwartz, J., Patterson, G. H., 2009. Photoactivatable fluorescent proteins for  
474 diffraction-limited and super-resolution imaging. *Trends in cell biology*. 19, 555-565.
- 475 Loros, J. J., et al., 1989. Molecular cloning of genes under control of the circadian clock in  
476 *Neurospora*. *Science*. 243, 385-388.
- 477 Malpighi, M., 1675-1679. *Anatome Plantarum: De Floribus*. Royal Society, London, UK.
- 478 McNally, M. T., Free, S. J., 1988. Isolation and characterization of a *Neurospora* glucose-  
479 repressible gene. *Current genetics*. 14, 545-551.
- 480 Money, N. P., 2021. Action and inertia in the study of hyphal growth. *Fungal Biology Reviews*.
- 481 Mouriño-Pérez, R. R., et al., 2016. Microtubules and associated molecular motors in  
482 *Neurospora crassa*. *Mycologia*. 108, 515-527.
- 483 Mouriño-Pérez, R. R., et al., 2006. Microtubule dynamics and organization during hyphal growth  
484 and branching in *Neurospora crassa*. *Fungal Genetics and Biology*. 43, 389-400.
- 485 Murphy, R., et al., 1996. GLE2, a *Saccharomyces cerevisiae* homologue of the  
486 *Schizosaccharomyces pombe* export factor RAE1, is required for nuclear pore complex  
487 structure and function. *Molecular biology of the cell*. 7, 1921-1937.
- 488 Pritchard, C. E., et al., 1999. RAE1 is a shuttling mRNA export factor that binds to a GLEBS-like  
489 NUP98 motif at the nuclear pore complex through multiple domains. *The Journal of cell*  
490 *biology*. 145, 237-254.
- 491 Ramos-García, S. L., et al., 2009. Cytoplasmic bulk flow propels nuclei in mature hyphae of  
492 *Neurospora crassa*. *Eukaryotic Cell*. 8, 1880-1890.
- 493 Riquelme, M., Martínez-Núñez, L., 2016. Hyphal ontogeny in *Neurospora crassa*: a model  
494 organism for all seasons. *F1000Research*. 5.
- 495 Roca, M. G., et al., 2010. Nuclear dynamics, mitosis, and the cytoskeleton during the early  
496 stages of colony initiation in *Neurospora crassa*. *Eukaryotic cell*. 9, 1171-1183.
- 497 Rodriguez, E. A., et al., 2017. The growing and glowing toolbox of fluorescent and photoactive  
498 proteins. *Trends in biochemical sciences*. 42, 111-129.
- 499 Schafmeier, T., et al., 2008. Circadian activity and abundance rhythms of the *Neurospora* clock  
500 transcription factor WCC associated with rapid nucleo-cytoplasmic shuttling. *Genes &*  
501 *development*. 22, 3397-3402.
- 502 Schuster, M., et al., 2015. Red fluorescent proteins for imaging *Zymoseptoria tritici* during  
503 invasion of wheat. *Fungal Genetics and Biology*. 79, 132-140.
- 504 Schwerdtfeger, C., Linden, H., 2000. Localization and light-dependent phosphorylation of white  
505 collar 1 and 2, the two central components of blue light signaling in *Neurospora crassa*.  
506 *European journal of biochemistry*. 267, 414-422.
- 507 Shaner, N. C., et al., 2004. Improved monomeric red, orange and yellow fluorescent proteins  
508 derived from *Discosoma* sp. red fluorescent protein. *Nature biotechnology*. 22, 1567-  
509 1572.

510 Shaner, N. C., et al., 2013. A bright monomeric green fluorescent protein derived from  
511 *Branchiostoma lanceolatum*. *Nature methods*. 10, 407-409.

512 Shaner, N. C., et al., 2008. Improving the photostability of bright monomeric orange and red  
513 fluorescent proteins. *Nature methods*. 5, 545-551.

514 Subach, O. M., et al., 2011. An enhanced monomeric blue fluorescent protein with the high  
515 chemical stability of the chromophore. *PloS one*. 6, e28674.

516 Verdín, J., et al., 2009. Functional stratification of the Spitzenkörper of *Neurospora crassa*.  
517 *Molecular microbiology*. 74, 1044-1053.

518 Von Appen, A., Beck, M., 2016. Structure determination of the nuclear pore complex with  
519 three-dimensional cryo electron microscopy. *Journal of molecular biology*. 428, 2001-  
520 2010.

521 Wiedenmann, J., et al., 2004. EosFP, a fluorescent marker protein with UV-inducible green-to-  
522 red fluorescence conversion. *Proceedings of the National Academy of Sciences*. 101,  
523 15905-15910.

524 Wong, R. W., 2010. Interaction between Rae1 and cohesin subunit SMC1 is required for proper  
525 spindle formation. *Cell cycle*. 9, 198-200.

526 Zander, G., et al., 2017. *Saccharomyces cerevisiae* Gle2/Rae1 is involved in septin organization,  
527 essential for cell cycle progression. *Yeast*. 34, 459-470.

528 Zhang, M., et al., 2012. Rational design of true monomeric and bright photoactivatable  
529 fluorescent proteins. *Nature methods*. 9, 727-729.

530 Zheng, X., et al., 2019. RAE1 promotes BMAL1 shuttling and regulates degradation and activity  
531 of CLOCK: BMAL1 heterodimer. *Cell death & disease*. 10, 1-12.

532 Zhou, L., et al., 2018. Superresolution and pulse-chase imaging reveal the role of vesicle  
533 transport in polar growth of fungal cells. *Science advances*. 4, e1701798.

534 Zhou, M., et al., 2013. Non-optimal codon usage affects expression, structure and function of  
535 clock protein FRQ. *Nature*. 495, 111-115.

536

537



538 **Supplemental Materials:**  
539

**Supplemental Figure 1 | NCU4502 promoter length assay using a luciferase reporter**

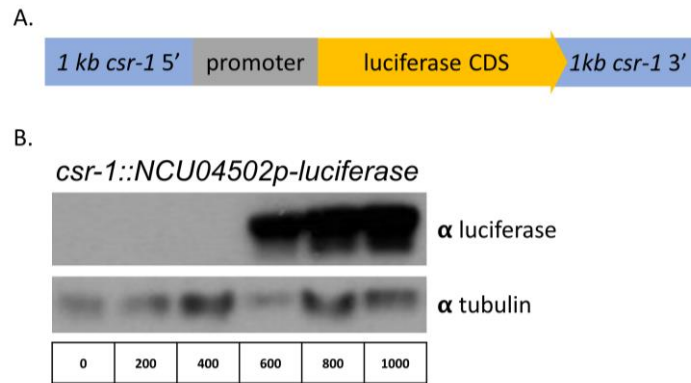

A) Schematic of luciferase reporter genetic construct. 1 kb upstream and downstream targeting flanks for homologous recombination at the *csr-1* locus were inserted into pRS426. Varying lengths of DNA up to 1 kb upstream of the translational start site (ATG) were inserted upstream of the firefly luciferase coding region into the vector using Gibson assembly. B) Western blot of luciferase expressed by varying lengths of NCU4502 promoter in liquid grown shaking culture under constant light at 25 °C.

540  
541

## Supplemental Figure 2 | Fluorescence spectra, laser lines, and bandpass emission filters for 4 color imaging

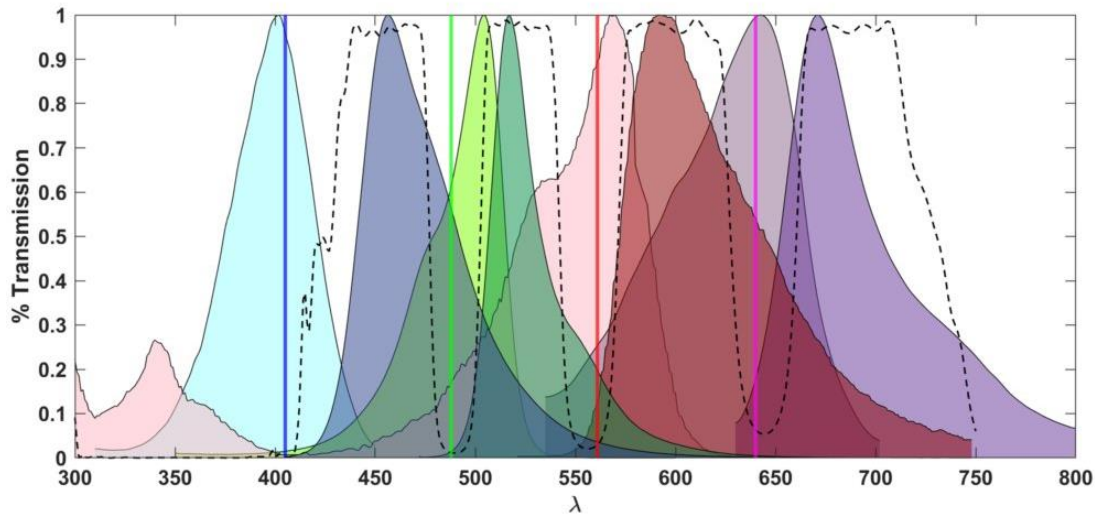

### Fluorescent Protein Spectra

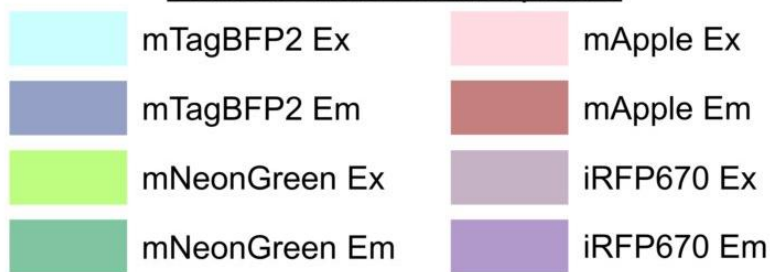

### Laser Lines

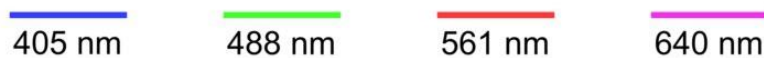

### Bandpass Filter

----- CHROMA® Quad bandpass filter 89100bs

Plot of the spectral properties of fluorescent proteins for use in 4-color imaging in *N. crassa*. Numerical data for spectra was acquired from FPbase.org and was replotted to create this figure. Laser lines shown are specific to the instrument the images were acquired on but are also common on many systems. Numerical data on band pass filters from Chroma (<https://www.chroma.com/spectra-viewer>).

544 **Supplemental Table 1 | Primers used to clone out *N.crassa* promoters.**

| Promoter         | Primer sequence |                           |
|------------------|-----------------|---------------------------|
| ccg-1            | Forward primer  | tagaaggagcagtccatctgc     |
|                  | Reverse primer  | tttggtgatgtgaggggttg      |
| NCU4502p (600bp) | Forward primer  | ggcaaacgagacgacaatgg      |
|                  | Reverse primer  | gatggatgctgatgatgatctcttc |
| NCU8097p (500bp) | Forward primer  | gcatcgtcacgtgaagtg        |
|                  | Reverse primer  | cgtgacgggatctgatag        |

545

546

547 **Supplemental Table 2 | Plasmids used in this study.**

| Plasmid                                  | Lab ID | Addgene ID | Promoter     | CDS               |
|------------------------------------------|--------|------------|--------------|-------------------|
| csr-1_son-1_sGFP                         | pBB112 | 191561     | NCU4502p     | son-1_sGFP        |
| csr-1_son-1_mApple                       | pBB113 | 191741     | NCU4502p     | son-1_mApple      |
| csr-1_son-1_mCherry                      | pBB114 | 191742     | NCU4502p     | son-1_mCherry     |
| csr-1_son-1_mNeonGreen                   | pBB115 | 191743     | NCU4502p     | son-1_mNeonGreen  |
| csr-1_son-1_mRuby3                       | pBB116 | 191744     | NCU4502p     | son-1_mRuby3      |
| csr-1_son-1_mScarlet                     | pBB117 | 191745     | NCU4502p     | son-1_mScarlet    |
| csr-1_son-1_mTagBFP2                     | pBB118 | 191746     | NCU4502p     | son-1_mTagBFP2    |
| csr-1_son-1_vsfGFP9                      | pBB119 | 191747     | NCU4502p     | son-1_vsfGFP9     |
| csr-1_son-1_mNeptune2.5                  | pBB120 | 191748     | NCU4502p     | son-1_mNeptune2.5 |
| csr-1_son-1_iRFP670                      | pBB122 | 191749     | NCU4502p     | son-1_iRFP670     |
| csr-1_CMVp_luc                           | pBB507 |            | CMVp         | luciferase        |
| csr-1_gpdp_luc                           | pBB508 |            | gpdp         | luciferase        |
| csr-1_ccg-1p_luc                         | pBB509 |            | ccg-1p       | luciferase        |
| csr-1_ToxAp_luc                          | pBB510 |            | ToxAp        | luciferase        |
| csr-1_NCU4502p-600_luc                   | pBB511 |            | NCU4502p-600 | luciferase        |
| csr-1_NCU8097p-500_luc                   | pBB514 |            | NCU8097p-500 | luciferase        |
| csr-1_hH1_mEos3.1_V5                     | pZW101 | 191750     | ccg-1p       | hH1_mEos3.1_V5    |
| csr-1_iRFP670_son-1_GpdToxA_bml_mTagBFP2 | pZW102 | 191751     | Gpdp         | son-1_iRFP670     |
|                                          |        |            | ToxAp        | bml_mTagBFP2      |

548

549

550

551 **Supplemental Table 3 | *N.crassa* strains used in this study.**

| Lab ID | Relevant Genotype                                                                                                                                                       | Figure(s) | Source/Reference |
|--------|-------------------------------------------------------------------------------------------------------------------------------------------------------------------------|-----------|------------------|
| 2007   | <i>csr-1::NCU04502p_son-1<sup>mApple</sup>, mat A</i>                                                                                                                   | 1         | This Study       |
| 2008   | <i>csr-1::NCU04502p_son-1<sup>mCherry</sup>, mat A</i>                                                                                                                  | 1         | This Study       |
| 2009   | <i>csr-1::NCU04502p_son-1<sup>mRuby3</sup>, mat A</i>                                                                                                                   | 1         | This Study       |
| 2010   | <i>csr-1::NCU04502p_son-1<sup>mScarlet</sup>, mat A</i>                                                                                                                 | 1         | This Study       |
| 2011   | <i>csr-1::NCU04502p_son-1<sup>mNeptune2.5</sup>, mat A</i>                                                                                                              | 1         | This Study       |
| 2012   | <i>csr-1::NCU04502p_son-1<sup>mNeonGreen</sup>, mat A</i>                                                                                                               | 1         | This Study       |
| 2013   | <i>csr-1::NCU04502p_son-1<sup>vsfGFP-9</sup>, mat A</i>                                                                                                                 | 1         | This Study       |
| 2014   | <i>csr-1::NCU04502p_son-1<sup>sGFP</sup>, ras-1<sup>bd</sup>, mat a</i>                                                                                                 | 1         | This Study       |
| 2015   | <i>csr-1::NCU04502p_son-1<sup>iRFP670</sup>, mat A</i>                                                                                                                  | 1         | This Study       |
| 1661   | <i>csr-1::NCU04502p_son-1<sup>mTagBFP2</sup>, mat A</i>                                                                                                                 | 1         | This Study       |
| 1965   | <i>csr-1::ccg-1p-luc, ras-1<sup>bd</sup>, mat a</i>                                                                                                                     | 2         | This Study       |
| 1966   | <i>csr-1::CMVp-luc, ras-1<sup>bd</sup>, mat a</i>                                                                                                                       | 2         | This Study       |
| 1967   | <i>csr-1::ToxAp-luc, ras-1<sup>bd</sup>, mat a</i>                                                                                                                      | 2         | This Study       |
| 1968   | <i>csr-1::NCU04502p-luc, ras-1<sup>bd</sup>, mat a</i>                                                                                                                  | 2         | This Study       |
| 1979   | <i>csr-1::NCU08097p-luc, ras-1<sup>bd</sup>, mat a</i>                                                                                                                  | 2         | This Study       |
| 1980   | <i>csr-1::gdp-luc, ras-1<sup>bd</sup>, mat a</i>                                                                                                                        | 2         | This Study       |
| 2016   | <i>wc-2<sup>mApple</sup>::hph+, cdc-11<sup>mNeonGreen</sup>::hph+,<br/>csr-1::son-1<sup>iRFP670</sup>_gdpToxA_bml<sup>mTagBFP2</sup>,<br/>ras-1<sup>bd</sup>, mat a</i> | 3         | This Study       |
| 2061   | <i>csr-1::ccg-1p-hH1<sup>mEos3.1_V5</sup>, mat A</i>                                                                                                                    | 4         | This Study       |

552
